# Supplementary material
Source: PubMed Central journal article supplement (PMC3444280)
Supplement: supp_ers221_jexbot078592_file001.pdf [file supp_ers221_jexbot078592_file001.pdf]

**The tomato (*Solanum lycopersicum* cv Micro-Tom) natural genetic variation *Rgl* and the DELLA mutant *procera* control the competence necessary to form adventitious roots and shoots.**

Simone Lombardi-Crestana, Mariana da Silva Azevedo, Geraldo Felipe Ferreira e Silva, Lílian Ellen Pino, Beatriz Appezzato-da-Glória, Antonio Figueira, Fabio Tebaldi Silveira Nogueira, Lázaro Eustáquio Pereira Peres

**Supplementary Material**

Table S1. Primers used in the RT-PCR analysis

| Primer           | Sequence                                               | SGN Accession* |
|------------------|--------------------------------------------------------|----------------|
| <i>GAPDH</i> F   | TCCATCACAGCCACTCAGAA                                   | Solyc05g014470 |
| <i>GAPDH</i> R   | TCAACCACGGACACATCAAC                                   |                |
| <i>GAMyb1</i> F  | AACCACATCATCAGGTCAAGC                                  | Solyc01g009070 |
| <i>GAMyb1</i> R  | GCACACAGGAAAATCCAGAAG                                  |                |
| <i>GOB</i> F     | CTCCTCGATTCTCTCCGTA                                    | Solyc07g062840 |
| <i>GOB</i> R     | AGTGCATGCAAGGTGTTTGA                                   |                |
| <i>miR164</i> F  | CCTGAGTGGAGAAGCAGGGCA                                  | At2g47585      |
| Universal R      | GTGCAGGGTCCGAGGT                                       |                |
| <i>miR164</i> RT | GTCGTATCCAGTGCAGGGTCCGAGGT<br>ATTCGCACTGGATACGACTGCACG |                |
| <i>TKn1</i> F    | GTGAAGGCCCTTTTCGTTT                                    | Solyc04g077210 |
| <i>TKn1</i> R    | GCTTAGGCCTATAAGGCTTGCT                                 |                |
| <i>TKn2</i> F    | GAGGCATTGGAAACCATCAG                                   | Solyc02g081120 |
| <i>TKn2</i> R    | CATGCACACAAGTAATATGCAA                                 |                |
| <i>PTS</i> F     | TCTAATTTTGATGGGATGAAGG                                 | Solyc06g072480 |
| <i>PTS</i> R     | TACGAGTTGTGGCAATCTAGC                                  |                |
| <i>SIPIN4</i> F  | TGCGGTTATTTTGGGATGT                                    | Solyc05g008060 |
| <i>SIPIN4</i> R  | TTTCTTGTCCTAATGCTCCAAA                                 |                |
| <i>AXL</i> F     | CGAGACAATTCATTCCCATGT                                  | Solyc11g072460 |
| <i>AXL</i> R     | GCAACTTGTCTTTTCACTTGC                                  |                |
| <i>IAA11</i> F   | GTTTTAACGGACGTGAAGCTG                                  | Solyc03g120380 |
| <i>IAA11</i> R   | TTATCTGCATCCTCCAATGCT                                  |                |

\*As annotated in the Sol Genomics Network - SGN (<http://solgenomics.net/search/loci>)

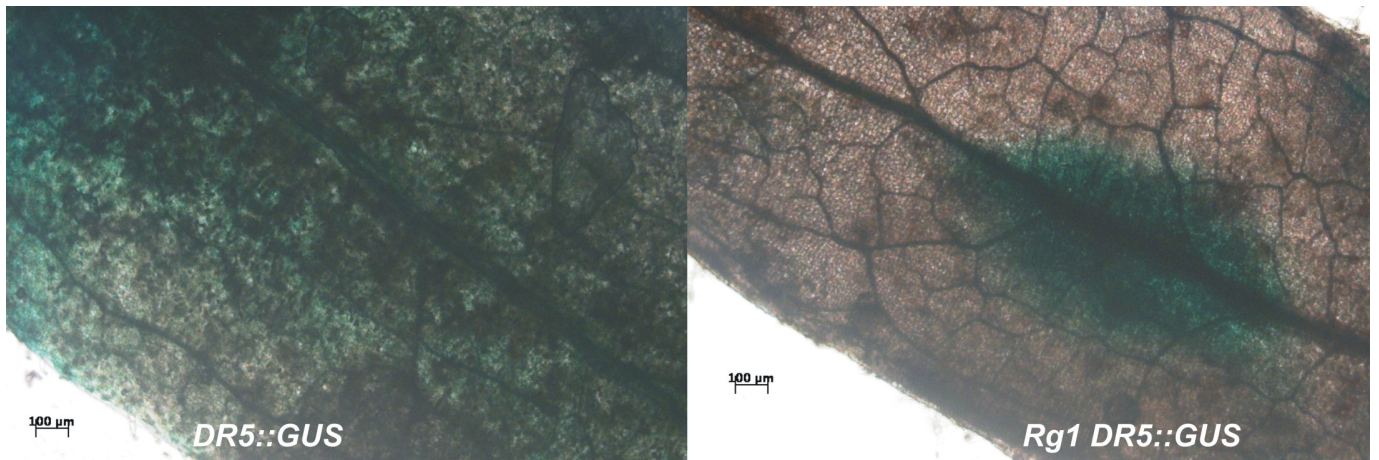

**Fig. S1.** GUS staining of *DR5::GUS* cotyledons in MT (left) and *Rg1* (right) genetic background. Eight-d-old cotyledons were cultivated on RIM (0.4 μM NAA) during 2 d.
